# Supplementary material for: Levels of infants’ urinary arsenic metabolites related to formula feeding and weaning with rice products exceeding the EU inorganic arsenic standard
Source: PLoS One. 2017 May 4;12(5):e0176923. doi: 10.1371/journal.pone.0176923 (PMC5417520; doi:10.1371/journal.pone.0176923)
Supplement: S1 Dataset — (XLSX) [file pone.0176923.s001.xlsx]

## Sheet: S1 Dataset
S1 Dataset: Urinary As speciation concentration (mg/l) according to the feeding mode used in Table 1 and Figure 1.
Feeding mode	Arsenobetaine (mg/l)	DMA (mg/l)	MMA (mg/l)	Inorganic arsenic (mg/l)
Breastfed	0.166	0.533	0.004	0.555
Breastfed	0.031	0.27	0.027	0.197
Breastfed	0.184	0.312	0.021	0.09
Breastfed	0.046	0.461	0.057	0.156
Breastfed	0.018	0.03	0.005	0.244
Breastfed	0.049	0.049	0.002	0.083
Breastfed	0.022	0.298	0.042	0.167
Breastfed	0.22	0.302	0.026	0.168
Breastfed	0.078	0.154	0.009	0.064
Breastfed	0.156	0.096	0.004	0.157
Breastfed	0.077	0.191	0.006	0.136
Breastfed	0.009	0.054	0.007	0.025
Breastfed	0.4	0.119	0.007	0.164
Breastfed	0.076	0.055	0.003	0.096
Breastfed	0.083	0.07	0.003	0.052
Breastfed	0.096	0.185	0.013	0.134
Breastfed	0.009	0.038	0.005	0.053
Breastfed	0.179	0.067	0.001	0.096
Breastfed	0.101	0.616	0.01	0.123
Breastfed	0.03	0.362	0.037	0.762
Formula	0.098	0.397	0.076	0.147
Formula	0.046	0.129	0.022	0.536
Formula	0.125	0.455	0.082	0.146
Formula	0.088	0.333	0.02	0.172
Formula	0.037	0.088	0.027	0.181
Formula	0.048	2.433	0.562	0.858
Formula	0.081	0.24	0.048	0.126
Formula	0.213	0.285	0.038	0.273
Formula	0.051	2.639	0.351	0.231
Formula	0.061	0.629	0.107	0.62
Formula	0.176	0.828	0.134	0.285
Formula	0.032	0.163	0.016	0.087
Formula	0.028	0.392	0.043	0.14
Formula	0.038	0.225	0.031	0.087
Formula	0.141	0.541	0.171	0.166
Formula	0.118	0.138	0.027	0.215
Formula	0.087	0.274	0.042	0.101
Formula	0.422	3.021	0.834	0.481
Formula	0.145	0.666	0.106	0.151
Formula	0.089	0.149	0.02	0.184
Formula	0.07	0.216	0.036	0.056
Formula	0.122	3.249	0.3	0.659
Formula	0.088	0.38	0.074	0.091
Formula	0.075	0.1	0.013	0.136
Formula	0.048	1.058	0.134	0.207
Formula	0.164	0.935	0.124	0.143
Formula	0.037	0.371	0.05	0.13
Formula	0.064	1.385	0.103	0.156
Formula	0.03	0.165	0.012	0.136
Formula	0.049	0.11	0.023	0.929
Formula	0.124	0.263	0.047	0.058
Formula	0.043	0.365	0.043	0.045
Mixture	0.068	0.353	0.044	0.155
Mixture	0.084	2.105	0.324	0.441
Mixture	0.085	0.218	0.038	0.319
Mixture	0.114	0.082	0.018	0.231
Mixture	0.061	0.568	0.098	0.13
Mixture	0.114	0.18	0.03	0.163
Mixture	0.071	0.083	0.012	0.064
Mixture	0.043	0.038	0	0.094
Mixture	0.121	0.199	0.033	0.357
Mixture	0.042	0.257	0.046	0.065
Mixture	0.159	0.144	0.011	0.07
Mixture	0.131	0.253	0	0.094
Mixture	0.054	1.97	0.328	0.46
Mixture	0.088	0.075	0.007	0.063
Mixture	0.034	0.196	0.002	0.064
Mixture	0.155	0.61	0.095	0.119
Mixture	0.08	0.13	0.03	0.127
Mixture	0.112	2.7	0.31	0.59
Mixture	0.067	0.103	0.021	0.143
Mixture	0.082	0.155	0.03	0.069
Mixture	0.038	0.31	0.027	0.247
Mixture	0.049	0.151	0.014	0.078
Mixture	0.014	0.031	0.002	0.059
Mixture	0.04	0.117	0.022	0.065
Mixture	0.053	0.138	0.031	0.151
Mixture	0.033	0.15	0.032	0.081
Mixture	0.022	0.155	0.007	0.061
