# Supplementary material for: Levels of infants’ urinary arsenic metabolites related to formula feeding and weaning with rice products exceeding the EU inorganic arsenic standard
Source: PLoS One. 2017 May 4;12(5):e0176923. doi: 10.1371/journal.pone.0176923 (PMC5417520; doi:10.1371/journal.pone.0176923)
Supplement: S1 Table — (XLSX) [file pone.0176923.s004.xlsx]

## Sheet: S1 Table
S1 Table: Rice-based infant products sampling details collected in 2016.
Product	Brand	Product description	Purchase place	Purchase place address
Baby rice	Brand A	Baby rice	Boots	35-47 Donegall Place, Belfast BT1 5AD, UK
Baby rice	Brand A	Baby rice	Boots	60-66 Dublin Rd, Belfast BT2 7HE, UK
Baby rice	Brand B	Baby rice	Asda	Asda online delivered to Belfast, UK
Baby rice	Brand B	Baby rice	Boots	60-66 Dublin Rd, Belfast BT2 7HE, UK
Baby rice	Brand B	Baby rice	Boots	26-27 Castle Court, Belfast BT1 1DD, UK
Baby rice	Brand B	Baby rice	Gordons Chemist	15-17 Cornmarket, Belfast BT1 4DA, UK
Baby rice	Brand B	Baby rice	Tesco	369 Lisburn Rd Belfast, BT9 7EP, UK
Baby rice	Brand B	Baby rice	Tesco	Tesco online delivered to Belfast, UK
Baby rice	Brand B	Baby rice	Tesco	2 Royal Ave, Belfast BT1 1DA, UK
Baby rice	Brand D	Baby rice	Asda	Asda online delivered to Belfast, UK
Baby rice	Brand D	Baby rice	Boots	35-47 Donegall Place, Belfast BT1 5AD, UK
Baby rice	Brand D	Baby rice	Tesco	Tesco online delivered to Belfast, UK
Baby rice	Brand E	Baby rice	Tesco	Tesco online delivered to Belfast, UK
Rice crackers	Brand A	Apple flavored rice cakes	Boots	26-27 Castle Court, Belfast BT1 1DD, UK
Rice crackers	Brand A	Apple flavored rice cakes	Boots	60-66 Dublin Rd, Belfast BT2 7HE, UK
Rice crackers	Brand A	Orange flavaoured rice cakes	Boots	35-47 Donegall Place, Belfast BT1 5AD, UK
Rice crackers	Brand A	Rice cakes	Boots	60-66 Dublin Rd, Belfast BT2 7HE, UK
Rice crackers	Brand A	Rice cakes	Boots	35-47 Donegall Place, Belfast BT1 5AD, UK
Rice crackers	Brand E	Apple flavored rice cakes	Boots	35-47 Donegall Place, Belfast BT1 5AD, UK
Rice crackers	Brand E	Apple flavored rice cakes	Boots	26-27 Castle Court, Belfast BT1 1DD, UK
Rice crackers	Brand E	Apple flavored rice cakes	Gordons Chemist	15-17 Cornmarket, Belfast BT1 4DA, UK
Rice crackers	Brand E	Apple flavored rice cakes	Lydl	A501 High St, Belfast BT1 2JZ, UK
Rice crackers	Brand E	Apple flavored rice cakes	Superdrugs	56-57 Castle Court, Belfast BT1 1FD, UK
Rice crackers	Brand E	Apple flavored rice cakes	Superdrugs	21-23 Ann Street, Belfast BT1 4EA, UK
Rice crackers	Brand E	Apple flavored rice cakes	Tesco	369 Lisburn Rd Belfast, BT9 7EP, UK
Rice crackers	Brand E	Apple flavored rice cakes	Tesco	Tesco online delivered to Belfast, UK
Rice crackers	Brand E	Apple flavored rice cakes	Tesco	2 Royal Ave, Belfast BT1 1DA, UK
Rice crackers	Brand E	Banana flavored rice cakes	Boots	60-66 Dublin Rd, Belfast BT2 7HE, UK
Rice crackers	Brand E	Banana flavored rice cakes	Tesco	Tesco online delivered to Belfast, UK
Rice crackers	Brand E	Cherry flavored rice cakes	Tesco	Tesco online delivered to Belfast, UK
Rice crackers	Brand E	Rasberry and blueberry flavored rice cakes	Boots	26-27 Castle Court, Belfast BT1 1DD, UK
Rice crackers	Brand E	Rasberry and blueberry flavored rice cakes	Boots	35-47 Donegall Place, Belfast BT1 5AD, UK
Rice crackers	Brand E	Rasberry and blueberry flavored rice cakes	Superdrugs	56-57 Castle Court, Belfast BT1 1FD, UK
Rice crackers	Brand E	Rasberry and blueberry flavored rice cakes	Tesco	369 Lisburn Rd Belfast, BT9 7EP, UK
Rice crackers	Brand E	Rasberry and blueberry flavored rice cakes	Tesco	Tesco online delivered to Belfast, UK
Rice crackers	Brand E	Rasberry and blueberry flavored rice cakes	Tesco	2 Royal Ave, Belfast BT1 1DA, UK
Rice crackers	Brand F	Apple flavored rice cakes	Asda	Asda online delivered to Belfast, UK
Rice crackers	Brand F	Bluberry flavored rice cakes	Asda	Asda online delivered to Belfast, UK
Rice crackers	Brand K	Apple flavored rice cakes	Tesco	Tesco online delivered to Belfast, UK
Rice crackers	Brand K	Apple flavored rice cakes	Tesco	2 Royal Ave, Belfast BT1 1DA, UK
Rice crackers	Brand M	Cheese and onion flaroved rice cakes	Lydl	A501 High St, Belfast BT1 2JZ, UK
Rice crackers	Brand M	Tomato flavour rice cakes	Lydl	A501 High St, Belfast BT1 2JZ, UK
Rice cereals	Brand F	Chocoloate flavored crisped rice	Asda	Asda online delivered to Belfast, UK
Rice cereals	Brand F	Crisped rice	Asda	Asda online delivered to Belfast, UK
Rice cereals	Brand H	Chocoloate flavored crisped rice	Lydl	A501 High St, Belfast BT1 2JZ, UK
Rice cereals	Brand H	Crisped rice	Lydl	A501 High St, Belfast BT1 2JZ, UK
Rice cereals	Brand J	Chocoloate flavored crisped rice	Asda	Asda online delivered to Belfast, UK
Rice cereals	Brand J	Chocoloate flavored crisped rice	Asda	Asda online delivered to Belfast, UK
Rice cereals	Brand J	Chocoloate flavored crisped rice	Mark & Spencer	515 Lisburn Rd, Northern Ireland BT9 7EZ, UK
Rice cereals	Brand J	Chocoloate flavored crisped rice	Mark & Spencer	515 Lisburn Rd, Northern Ireland BT9 7EZ, UK
Rice cereals	Brand J	Chocoloate flavored crisped rice	Mark & Spencer	48 Donagall Place, Belfast BT1 5BY, UK
Rice cereals	Brand J	Chocoloate flavored crisped rice	Mark & Spencer	48 Donagall Place, Belfast BT1 5BY, UK
Rice cereals	Brand J	Chocoloate flavored crisped rice	Spar	51 Bradbury Pl, Belfast BT7 1RR, UK
Rice cereals	Brand J	Chocoloate flavored crisped rice	Spar	36 Lisburn Rd Belfast, BT9 7AA, UK
Rice cereals	Brand J	Chocoloate flavored crisped rice	Spar	51 Bradbury Pl, Belfast BT7 1RR, UK
Rice cereals	Brand J	Chocoloate flavored crisped rice	Tesco	369 Lisburn Rd Belfast, BT9 7EP, UK
Rice cereals	Brand J	Chocoloate flavored crisped rice	Tesco	369 Lisburn Rd Belfast, BT9 7EP, UK
Rice cereals	Brand J	Chocoloate flavored crisped rice	Tesco	2 Royal Ave, Belfast BT1 1DA, UK
Rice cereals	Brand J	Chocoloate flavored crisped rice	Tesco	2 Royal Ave, Belfast BT1 1DA, UK
Rice cereals	Brand J	Chocoloate flavored crisped rice	The Co-operative	191 Lisburn Rd, Belfast BT9 7EJ, UK
Rice cereals	Brand J	Chocoloate flavored crisped rice	The Co-operative	191 Lisburn Rd, Belfast BT9 7EJ, UK
Rice cereals	Brand J	Crisped rice	Asda	Asda online delivered to Belfast, UK
Rice cereals	Brand J	Crisped rice	Asda	Asda online delivered to Belfast, UK
Rice cereals	Brand J	Crisped rice	Mark & Spencer	515 Lisburn Rd, Northern Ireland BT9 7EZ, UK
Rice cereals	Brand J	Crisped rice	Mark & Spencer	48 Donagall Place, Belfast BT1 5BY, UK
Rice cereals	Brand J	Crisped rice	Poundland	511-513 Lisburn Rd, Belfast BT9 7HN, UK
Rice cereals	Brand J	Crisped rice	Spar	36 Lisburn Rd Belfast, BT9 7AA, UK
Rice cereals	Brand J	Crisped rice	Spar	51 Bradbury Pl, Belfast BT7 1RR, UK
Rice cereals	Brand J	Crisped rice	Tesco	369 Lisburn Rd Belfast, BT9 7EP, UK
Rice cereals	Brand J	Crisped rice	Tesco	2 Royal Ave, Belfast BT1 1DA, UK
Rice cereals	Brand J	Crisped rice	The Co-operative	191 Lisburn Rd, Belfast BT9 7EJ, UK
Rice cereals	Brand K	Crisped rice	Tesco	369 Lisburn Rd Belfast, BT9 7EP, UK
Rice cereals	Brand K	Crisped rice	Tesco	2 Royal Ave, Belfast BT1 1DA, UK
