# Supplementary material for: Levels of infants’ urinary arsenic metabolites related to formula feeding and weaning with rice products exceeding the EU inorganic arsenic standard
Source: PLoS One. 2017 May 4;12(5):e0176923. doi: 10.1371/journal.pone.0176923 (PMC5417520; doi:10.1371/journal.pone.0176923)
Supplement: S2 Dataset — (XLSX) [file pone.0176923.s002.xlsx]

## Sheet: S2 Dataset
S2 Dataset: Urinary As species natural log concentrations in paired samples before and after weaning used in Table 2 and Figure 2.
Participant	Stage	Arsenobetaine (mg/l)	DMA (mg/l)	MMA (mg/l)	Inorganic arsenic (mg/l)
1	Pre-weaning	0.166	0.533	0.004	0.555
2	Pre-weaning	0.096	0.185	0.013	0.134
3	Pre-weaning	0.028	0.392	0.043	0.14
4	Pre-weaning	0.124	0.263	0.047	0.058
5	Pre-weaning	0.049	0.11	0.023	0.929
6	Pre-weaning	0.122	3.249	0.3	0.659
7	Pre-weaning	0.155	0.61	0.095	0.119
8	Pre-weaning	0.038	0.225	0.031	0.087
9	Pre-weaning	0.179	0.067	0.001	0.096
10	Pre-weaning	0.03	0.15	0.03	0.08
11	Pre-weaning	0.03	0.36	0.04	0.76
1	Post-weaning	3.3	8.52	1.34	2.07
2	Post-weaning	0.02	0.08	0.01	0.09
3	Post-weaning	0.3	1.03	0.09	0.2
4	Post-weaning	0.05	1.2	0.14	0.19
5	Post-weaning	0.05	1.2	0.24	1.07
6	Post-weaning	0.12	7.98	0.95	3.96
7	Post-weaning	0.02	0.3	0.04	0.07
8	Post-weaning	0.2	4.76	0.87	0.6
9	Post-weaning	10.22	9.27	0.517	0.898
10	Post-weaning	0.041	2.383	0.222	0.208
11	Post-weaning	0.003	2.964	0.131	0.212
