# Supplementary material for: Levels of infants’ urinary arsenic metabolites related to formula feeding and weaning with rice products exceeding the EU inorganic arsenic standard
Source: PLoS One. 2017 May 4;12(5):e0176923. doi: 10.1371/journal.pone.0176923 (PMC5417520; doi:10.1371/journal.pone.0176923)
Supplement: S2 Table — (XLSX) [file pone.0176923.s005.xlsx]

## Sheet: S2 Table
S2 Table: Certified, found and recovery values for the Certified References Materials ClinChek® - Control level I, and Rice flour NIST-1568b.
	Certified Reference Materials	Species of As
	ClinChek® - Control level I (n = 9)	i-As	MMA	DMA	AsB
	Found values: Mean ± SE (mg/l)	5.16 ± 0.11	2.37 ± 0.04	10.07 ± 0.23	15.88 ± 0.35
	Cerfied values: Mean & range (mg/l)	4.55 (2.73 – 6.37)	2.50 (1.50 – 3.50)	9.80 (5.88 – 13.7)	16.8 (12.6 – 21.0)
	Recovery ± SE (%)	113 ± 2	95 ± 2	102 ± 2	95 ± 2
	Rice flour NIST-1568b (n = 4)	i-As	MMA	DMA
	Found values: Mean ± SE (mg/l)	0.091 ± 0.001	0.015 ± 0.001	0.182 ± 0.005
	Certified values: Mean ± SE (mg/l)	0.092 ± 0.010	0.011 ± 0.003	0.180 ± 0.012
	Recovery ± SE (%)	99 ± 1	126 ± 2	101 ± 3
